# Supplementary material for: A Redox‐active Mn Porphyrin, MnTnBuOE‐2‐PyP5+, Synergizes with Carboplatin in Treatment of Chemoresistant Ovarian Cell Line
Source: Hindawi journal article supplement (doi:10.1155/2022/9664636), 2022-01-01
Supplement: f1 [file 9664636.f1.pdf]

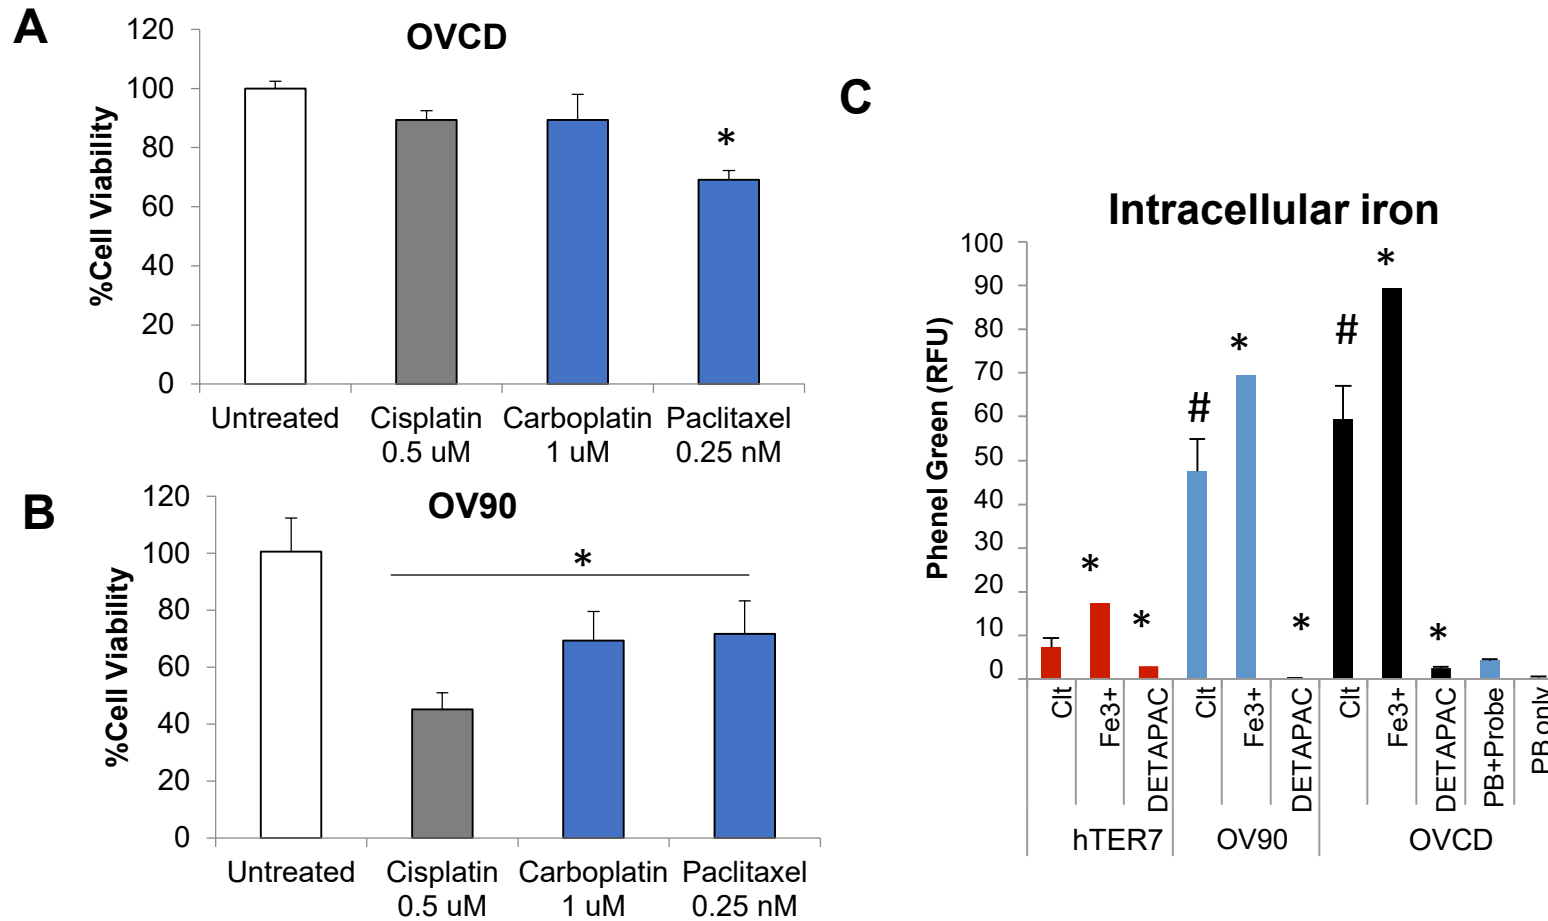

**Supplementary Figure 1.** Testing chemotherapy resistant in **(A)** OVCD cells and **(B)** OV90 cells. Cells were cultured for 24 prior to treatment. Cell viability using colony survival assay was performed. % Cell viability was normalized to untreated group. **(C)** Intracellular iron was measured using Phenel Green fluorescence probe. \*P-value  $\leq 0.05$  when compared to untreated. #P-Value  $\leq 0.05$  when compared to hTER7.

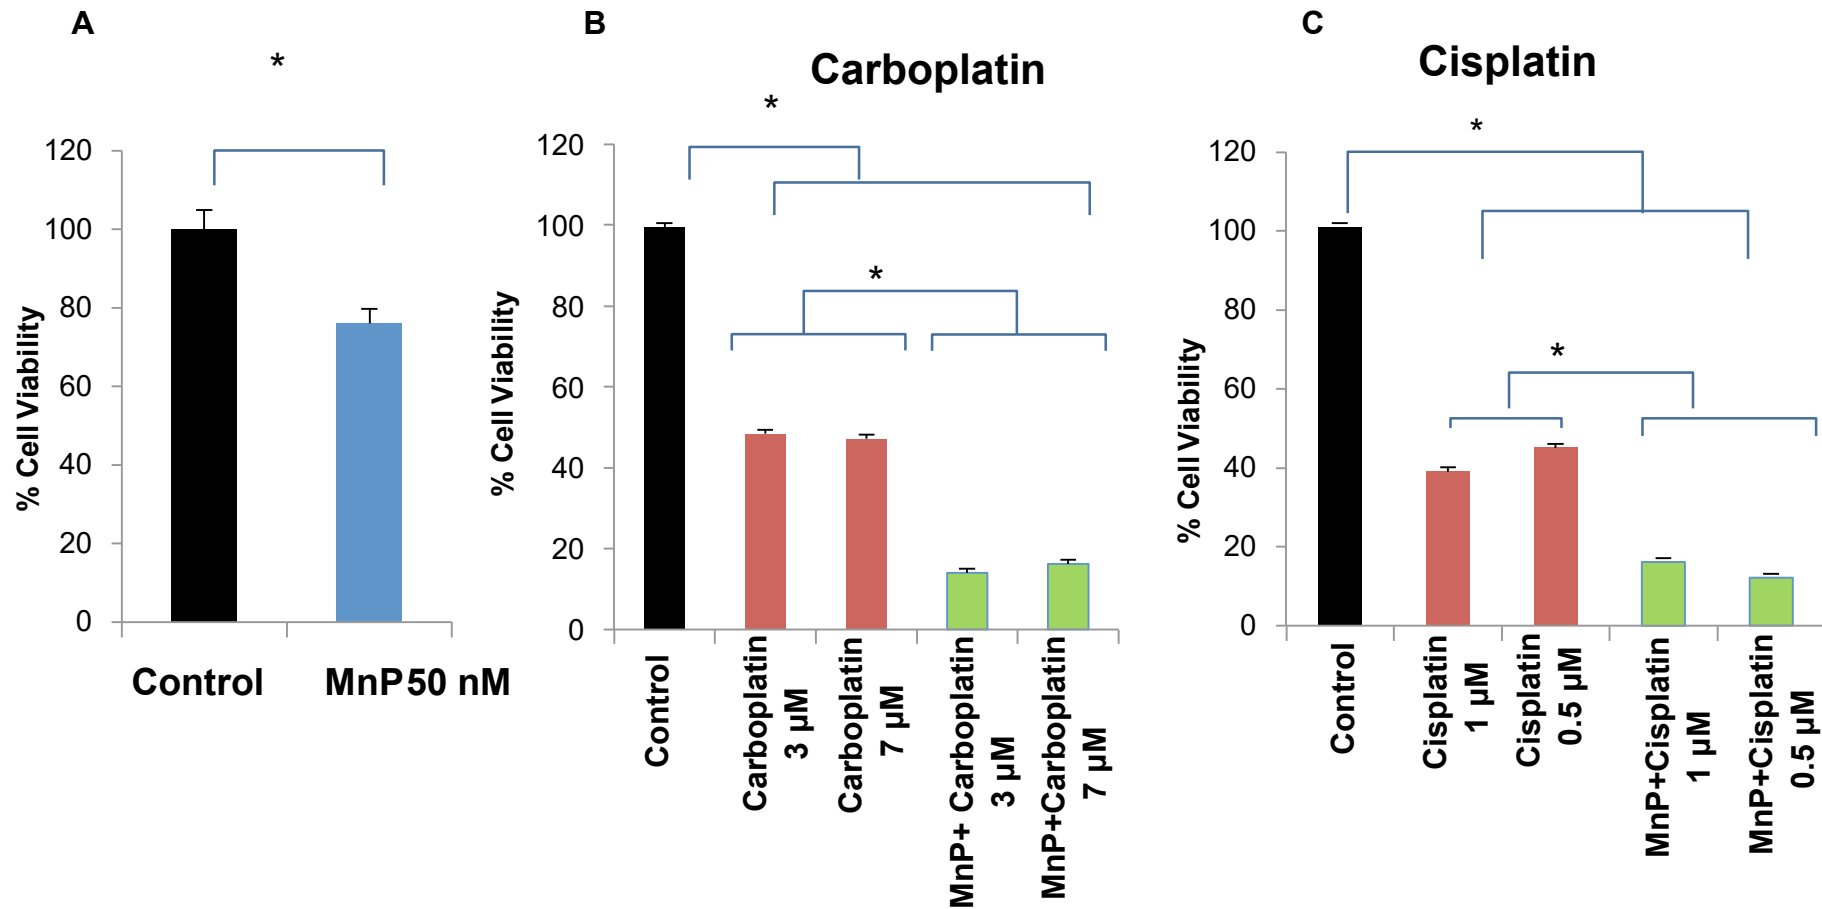

**Supplementary Figure 2.** Synergistic effect of MnP and Platinum compounds on TOV 21G. Colony survival assay was performed after 24 hr treatment. **(A)** MnP. **(B)** Carboplatin. **(C)** Cisplatin. MnP and drugs were added at the same time.

## A. Extracellular H<sub>2</sub>O<sub>2</sub>

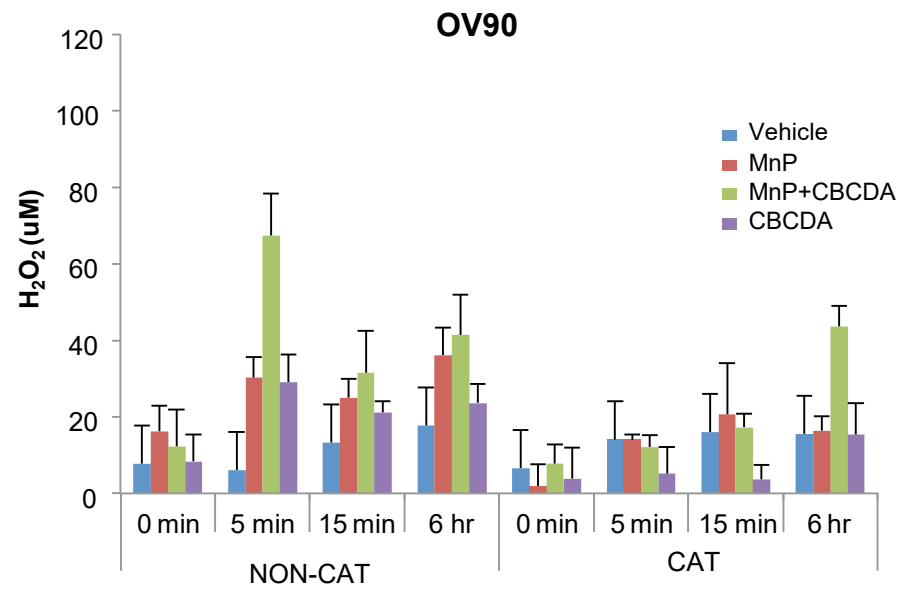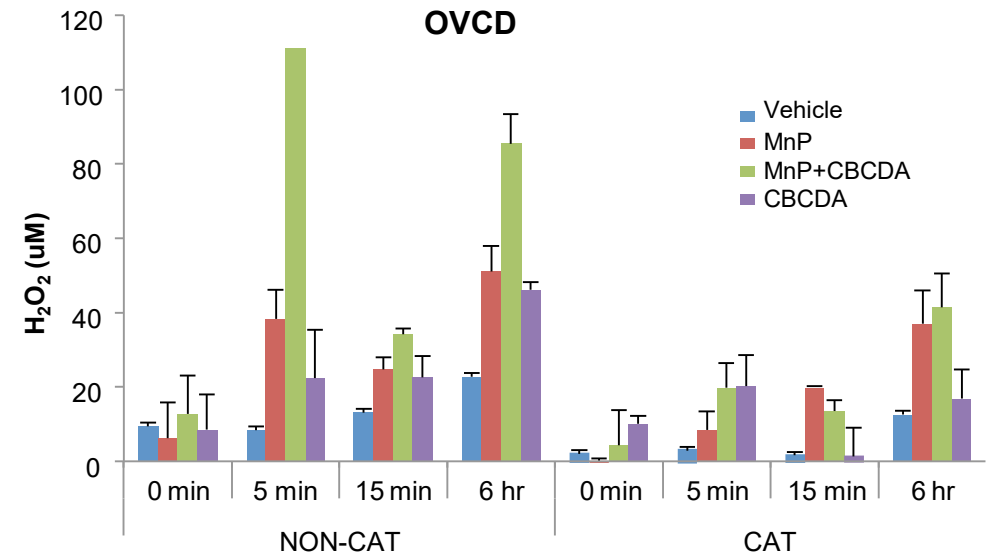

## B. Cell Viability

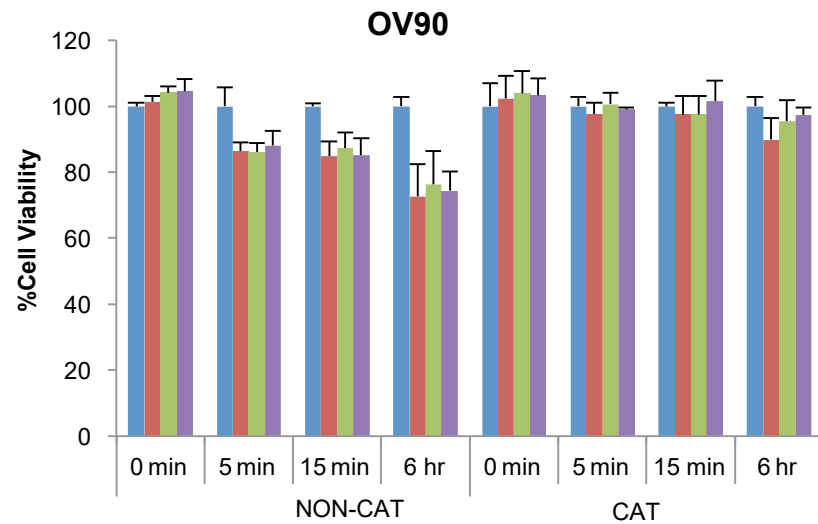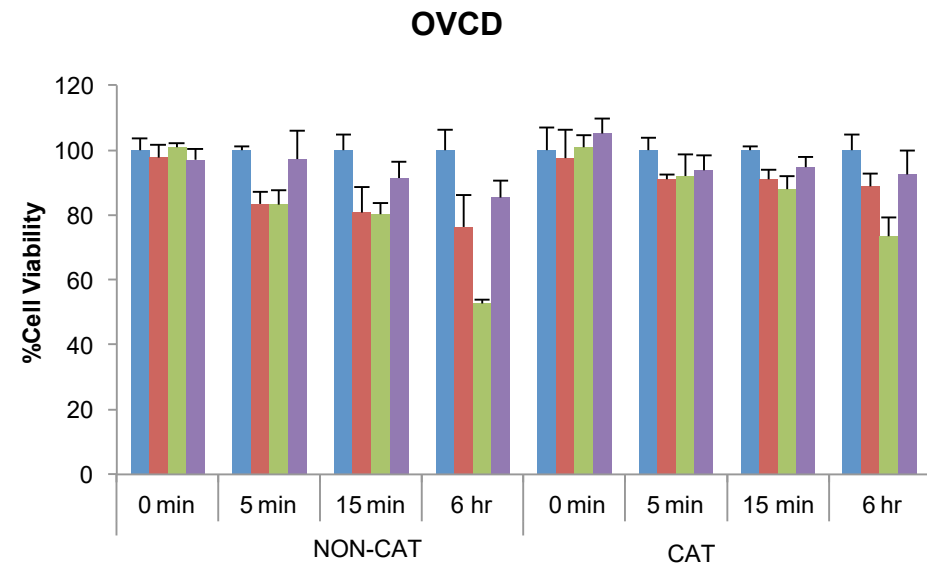

**Supplementary Figure 3.** Cell viability correlated with H<sub>2</sub>O<sub>2</sub> production after MnP and CBCDA treatment at various time point. **(A)** Extracellular H<sub>2</sub>O<sub>2</sub> treatment. **(B)** Cell viability with MTT.

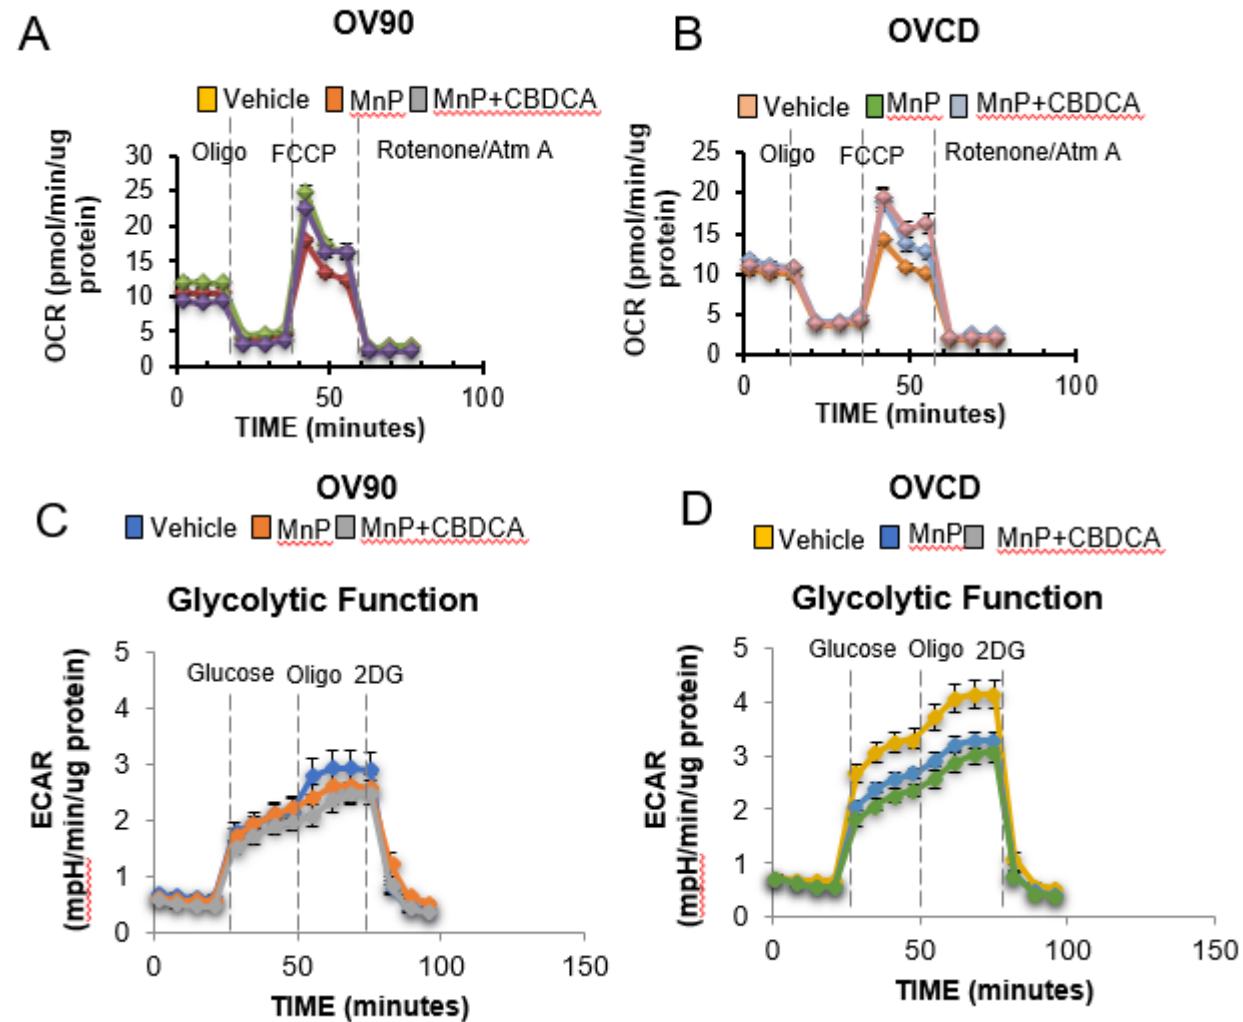

**Supplementary Figure 4.** Co-treatment of MnP and Carboplatin inhibited mitochondrial respiratory and ATP production in chemo-resistant ovarian cancer. Cells were treated with MnP and/or CBDCA for 6 hr. Live cells were then used for the measurement. Seahorse XF Analyzers was used to measure OCR and ECAR in OV90 (**A,C**) and in OVCD (**B,D**). Oligo=Oligomycin. FCCP = Carbonyl cyanide-p-trifluoromethoxyphenylhydrazone. AtmA = Antimycin A. 2DG=2-deoxy-d-glucoses.

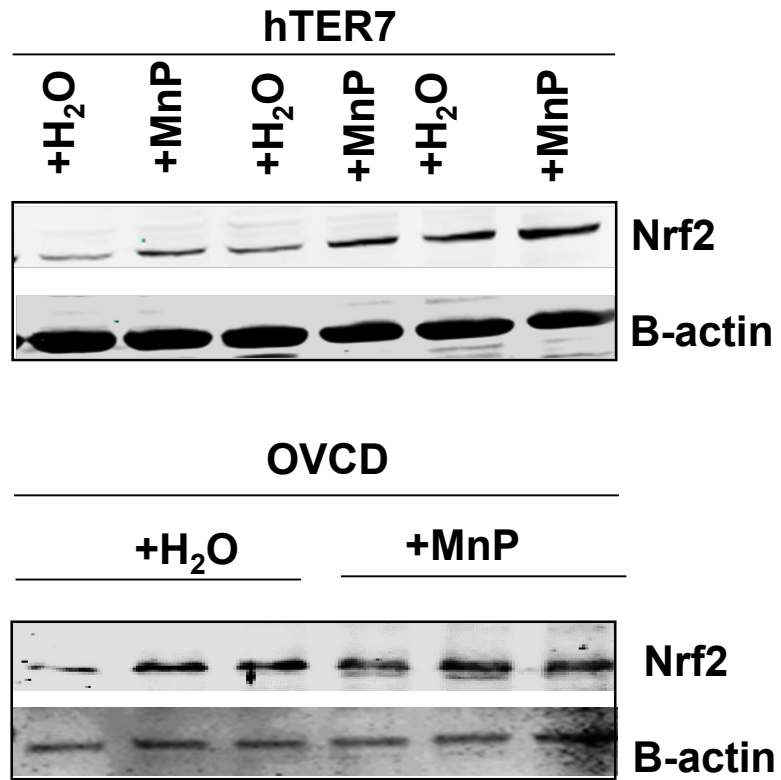

**Supplementary Figure 5.** Western blots demonstrated expression of Nrf2 protein after MnP treatment 6 hr.
